# Supplementary material for: Syntheses, characterization, and photo-hydrogen-evolving properties of tris(2,2′-bipyridine)ruthenium(ii) derivatives tethered to a cis-Pt(ii)Cl2unit: insights into the structure–activity relationship
Source: Royal Society of Chemistry journal article supplement (doi:10.1039/b617617h), 2007-01-01
Supplement: b617617h.pdf [file b617617h.pdf]

## Supporting Information

### **Syntheses, Characterization, and Photo-Hydrogen-Evolving Properties of Tris(2,2'-bipyridine)ruthenium(II) Derivatives Tethered to a *cis*-Pt(II)Cl<sub>2</sub> Unit: Insights into the Structure-Activity Relationship**

**Hironobu Ozawa,<sup>a</sup> Yuki Yokoyama,<sup>a</sup> Masa-aki Haga,<sup>b</sup> and Ken Sakai\*<sup>a</sup>**

*<sup>a</sup>Department of Chemistry, Faculty of Science, Kyushu University, 6-10-1 Hakozaki, Higashi-ku, Fukuoka 812-8581, Japan*

*<sup>b</sup>Department of Applied Chemistry, Faculty of Science and Engineering, Chuo University, 1-13-27 Kasuga, Bunkyo-ku, Tokyo 112-8551, Japan*

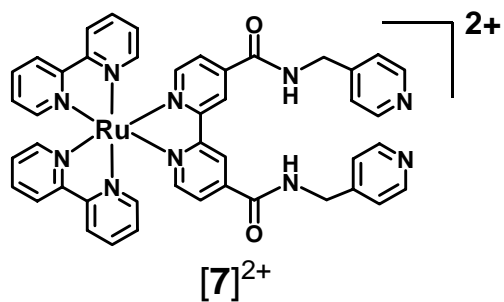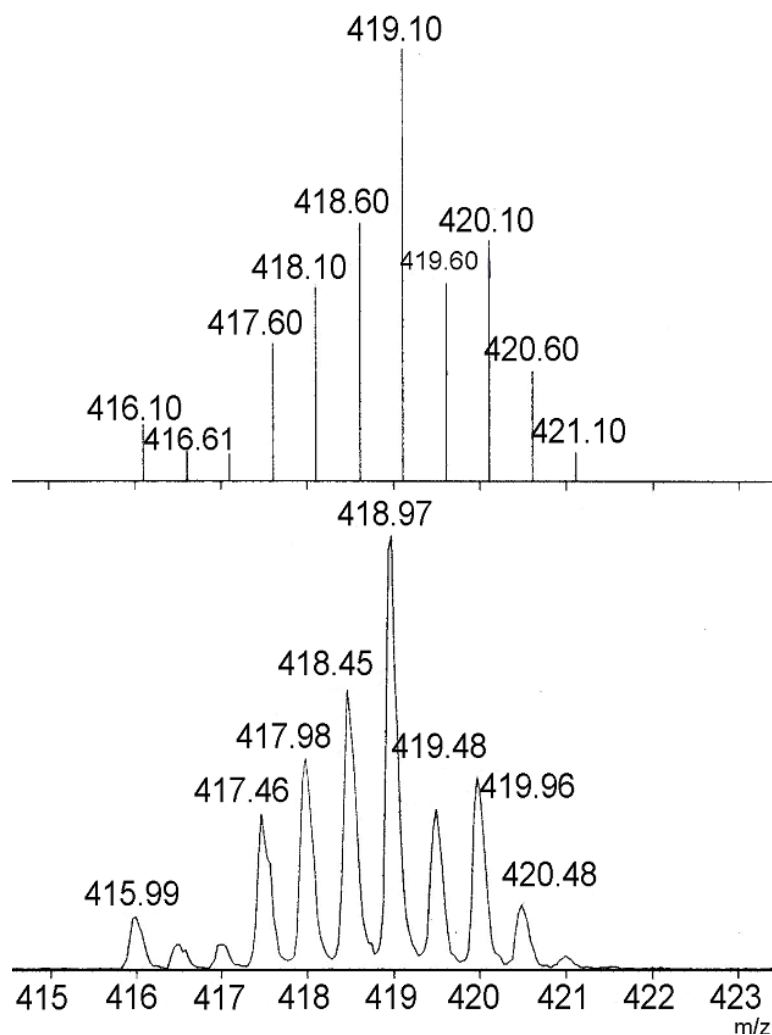

**Figure S1.** The observed (bottom) and calculated (top) positive-ion ESI-TOF mass spectra obtained for a solution of  $[7](PF_6)_2 \cdot 3H_2O$  in  $CH_3CN$  (Micromass LCT), in which a dicationic ion  $[7]^{2+}$  (419.10 m/z) is detected.

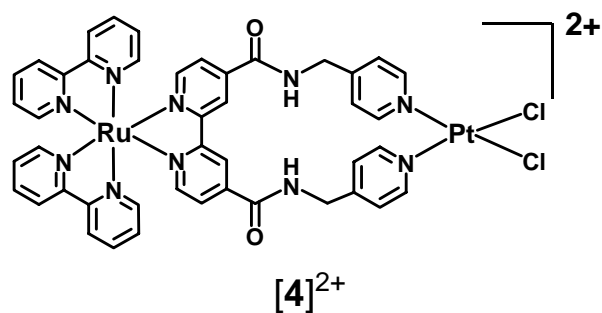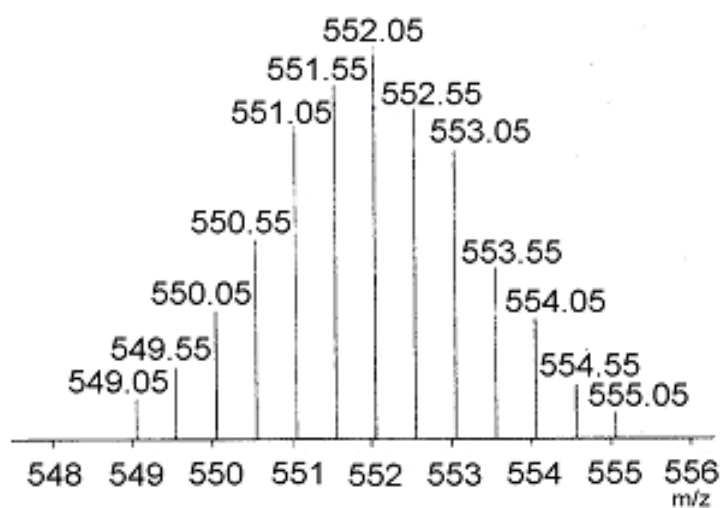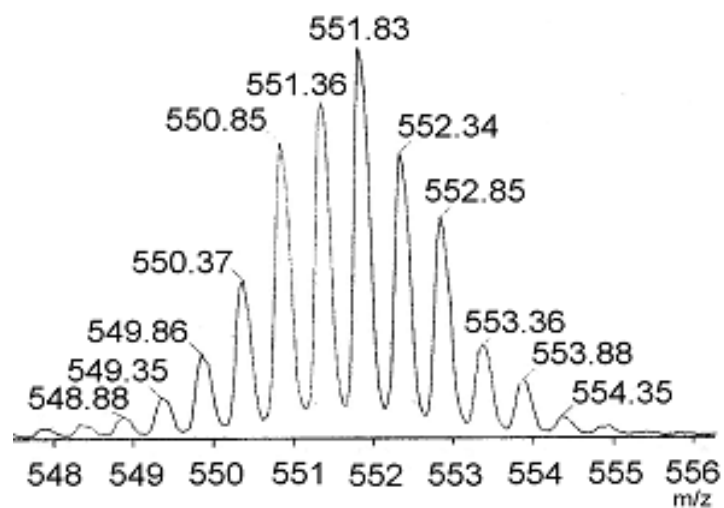

**Figure S2.** The observed (bottom) and calculated (top) positive-ion ESI-TOF mass spectra obtained for a solution of  $[4](PF_6)_2 \cdot 3H_2O$  in  $CH_3CN$  (Micromass LCT), in which a dicationic ion  $[4]^{2+}$  (552.05 m/z) is detected.

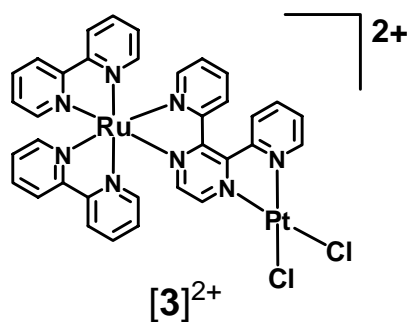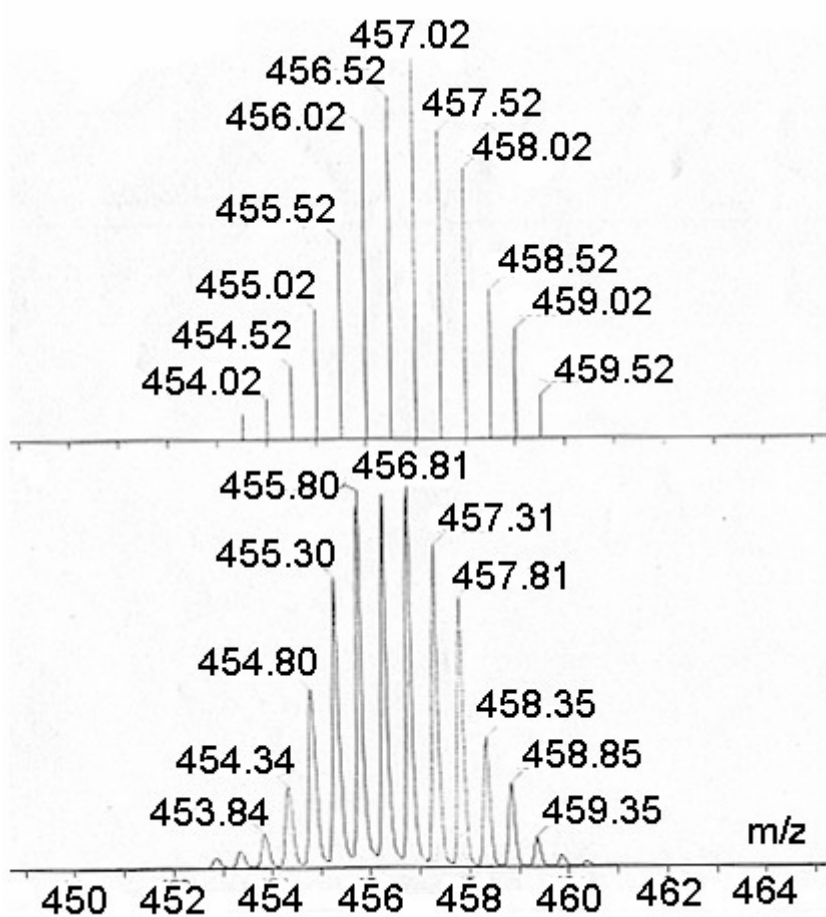

**Figure S3.** The observed (bottom) and calculated (top) positive-ion ESI-TOF mass spectra obtained for a solution of [3](PF<sub>6</sub>)<sub>2</sub> in CH<sub>3</sub>CN (Micromass LCT), in which a dicationic ion [3]<sup>2+</sup> (457.02 m/z) is detected.

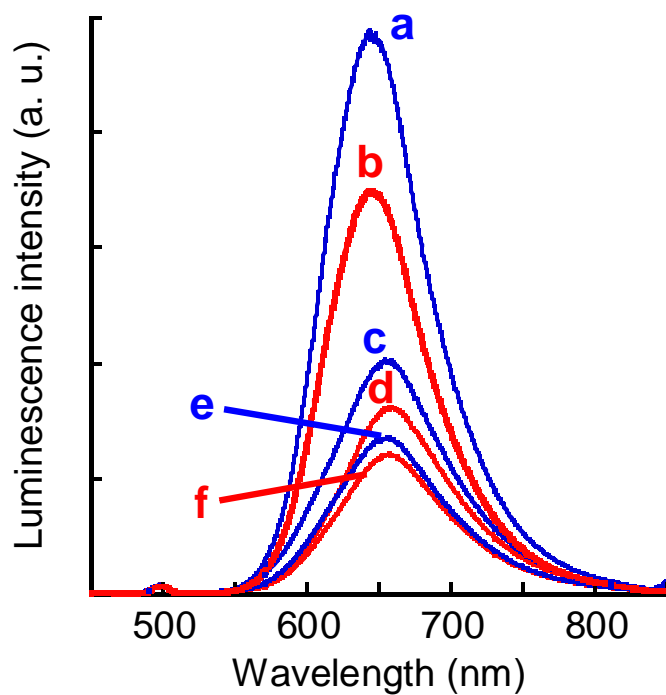

**Figure S4.** Luminescence spectra of  $[5](PF_6)_2 \cdot H_2O$  in Ar (a) and in air (b),  $[7]Cl_2 \cdot 2H_2O$  in Ar (c) and in air (d), and  $[4](NO_3)_2 \cdot H_2O$  in Ar (e) and in air (f) in  $H_2O$  at 20 °C. The excited wavelength was fixed at  $425 \pm 2.5$  nm. All the solutions were prepared to have an equal absorbance at 425 nm (absorbance was 0.1).
